# Supplementary material for: Transparent conducting oxides: A δ-doped superlattice approach
Source: PubMed Central journal article supplement — Sci Rep. 2014 Aug 11;4:6021. doi: 10.1038/srep06021 (PMC4127498; doi:10.1038/srep06021), 2014-08-11
Supplement: srep06021-s1.pdf [file srep06021-s1.pdf]

# Transparent conducting oxides: A $\delta$ -doped superlattice approach

Valentino R. Cooper,<sup>1</sup> Sung Seok A. Seo,<sup>1,2</sup> Suyoun Lee,<sup>1,3</sup>

Jun Sung Kim,<sup>4</sup> Woo Seok Choi,<sup>1,5</sup> Satoshi Okamoto,<sup>1</sup> and Ho Nyung Lee<sup>1</sup>

<sup>1</sup>Materials Science and Technology Division, Oak Ridge National Laboratory, Oak Ridge, Tennessee, 37831, USA

<sup>2</sup>Department of Physics and Astronomy, University of Kentucky, Lexington, Kentucky 40506, USA

<sup>3</sup>Electronic Materials Center, Korea Institute of Science and Technology, Seoul 136-791, Korea

<sup>4</sup>Department of Physics, Pohang University of Science and Technology, Pohang 790-784, Korea

<sup>5</sup>Sungkyunkwan University, Suwon, Gyeonggi-do 440-746, Korea

(Dated: June 17, 2014)

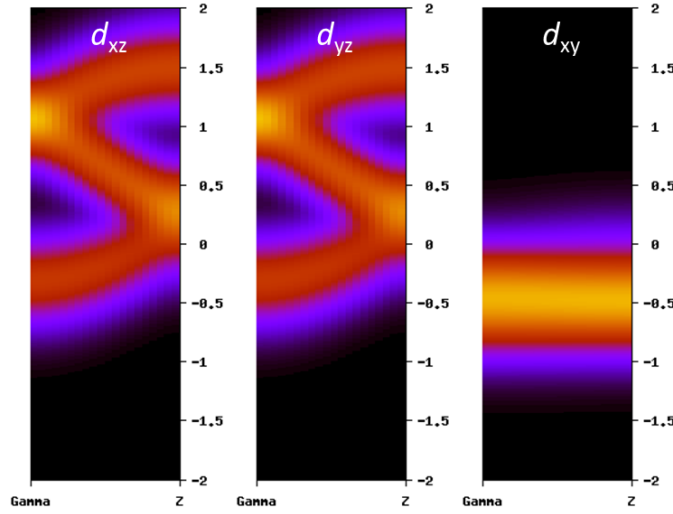

Figure S1: k-resolved density of states for individual  $d_{xz}$ ,  $d_{yz}$  and  $d_{xy}$  orbitals for the [L1/S2] superlattice along the  $\Gamma$ -Z direction.

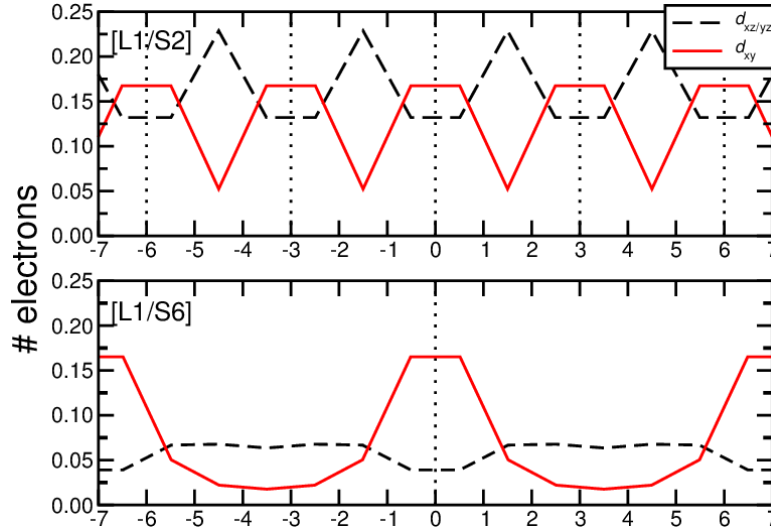

Figure S2: Charge distribution as a function of the relative  $c$ -axis coordinate for the for the  $d_{xz/yz}$  and  $d_{xy}$  orbitals for the [L1/S2] (top) and [L1/S6] (bottom) superlattices. Dotted lines indicate the position of the LaO planes and each tick along the  $x$ -axis represents one perovskite unit-cell.

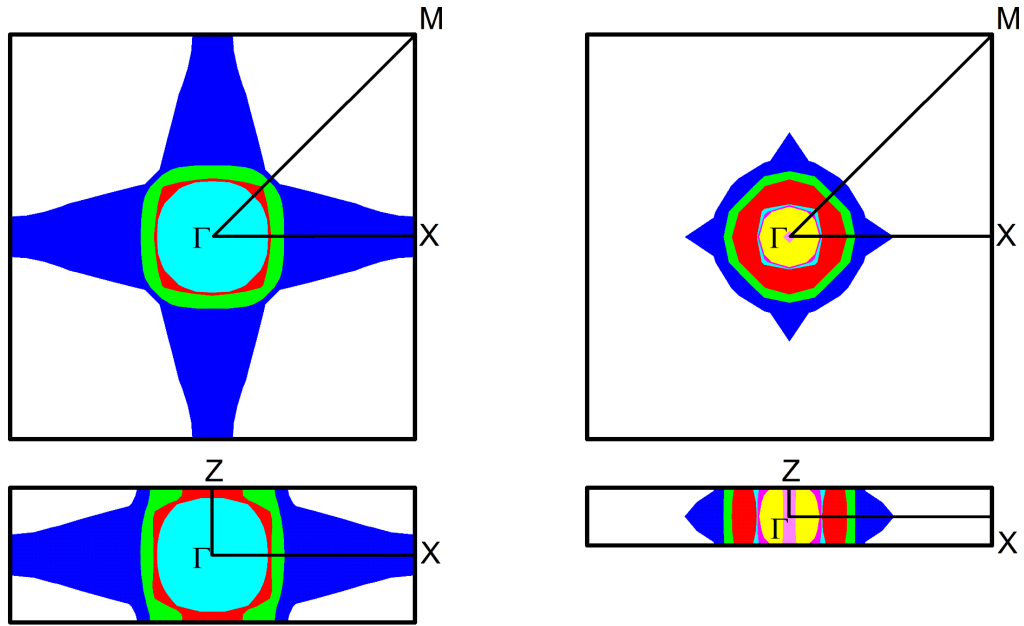

Figure S3: 2D Fermi-surface plots in the XY (top) and XZ (bottom) planes for the [L1/S2] (left) and [L1/S6] (right) superlattices.
